# Supplementary material for: Neonicotinoid Seed Treatments Have Significant Non-target Effects on Phyllosphere and Soil Bacterial Communities
Source: Front Microbiol. 2021 Jan 13;11:619827. doi: 10.3389/fmicb.2020.619827 (PMC7873852; doi:10.3389/fmicb.2020.619827)
Supplement: Supplementary Table 3 — Significantly differentially bacterial ASVs of phyllosphere associated with control and neonicotinoid seed treatment. Differential expression analysis on sequence data (DESeq2) detects the bacterial ASVs that are significantly differentially abundant (adjusted P < 0.05) between soybean and corn phyllosphere control and neonicotinoid-treated samples in a 3-year rotation in L’Acadie. The ASVs with a positive log2FoldChange are associated with the neonicotinoid-treated samples, while the ones with a negative log2FoldChange are related to the controls. [file Table_3.XLSX]

## Sheet: SuppTab3
ASV	baseMean	log2FoldChange	lfcSE	stat	pvalue	padj	Kingdom	Phylum	Class	Order	Family	Genus	Species
ASV14394	20.7471	7.97422	1.68608	4.72945	2.3e-06	0.000446	Bacteria	Proteobacteria	Gammaproteobacteria	Pseudomonadales	Moraxellaceae	Acinetobacter	NA
ASV37099	22.7378	2.82235	0.594206	4.74979	2e-06	0.000446	Bacteria	Bacteroidetes	Bacteroidia	Cytophagales	Hymenobacteraceae	Hymenobacter	NA
ASV37265	23.7939	3.84512	0.814725	4.71953	2.4e-06	0.000446	Bacteria	Bacteroidetes	Bacteroidia	Cytophagales	Hymenobacteraceae	Hymenobacter	NA
ASV26187	43.416	-2.27169	0.545555	-4.16399	3.13e-05	0.0044252	Bacteria	Proteobacteria	Alphaproteobacteria	Acetobacterales	Acetobacteraceae	Belnapia	moabensis
ASV37399	93.6345	1.58114	0.402738	3.92599	8.64e-05	0.0097775	Bacteria	Bacteroidetes	Bacteroidia	Cytophagales	Hymenobacteraceae	Hymenobacter	NA
ASV37336	10.8311	2.35261	0.61292	3.83835	0.0001239	0.0116842	Bacteria	Bacteroidetes	Bacteroidia	Cytophagales	Hymenobacteraceae	Hymenobacter	NA
ASV14254	18.6231	3.26572	0.881105	3.70639	0.0002102	0.0169992	Bacteria	Proteobacteria	Gammaproteobacteria	Pseudomonadales	Pseudomonadaceae	Pseudomonas	NA
ASV14054	33.3544	-2.46408	0.687335	-3.58498	0.0003371	0.0197485	Bacteria	Proteobacteria	Gammaproteobacteria	Enterobacteriales	Enterobacteriaceae	Arsenophonus	NA
ASV14235	39.779	4.1213	1.15249	3.57598	0.0003489	0.0197485	Bacteria	Proteobacteria	Gammaproteobacteria	Pseudomonadales	Pseudomonadaceae	Pseudomonas	NA
ASV37433	46.7557	1.86802	0.518818	3.60053	0.0003176	0.0197485	Bacteria	Bacteroidetes	Bacteroidia	Cytophagales	Hymenobacteraceae	Hymenobacter	NA
ASV3710	6.40028	2.41351	0.686735	3.51447	0.0004406	0.020783	Bacteria	Actinobacteria	Actinobacteria	Frankiales	Geodermatophilaceae	Blastococcus	NA
ASV37100	4.4735	3.28177	0.930568	3.52663	0.0004209	0.020783	Bacteria	Bacteroidetes	Bacteroidia	Cytophagales	Hymenobacteraceae	Hymenobacter	NA
ASV29983	5.82371	-2.87035	0.824902	-3.47963	0.0005021	0.0218608	Bacteria	Proteobacteria	Alphaproteobacteria	Caulobacterales	Caulobacteraceae	Brevundimonas	NA
ASV14188	16.1383	6.11356	1.77435	3.44553	0.0005699	0.023042	Bacteria	Proteobacteria	Gammaproteobacteria	Pseudomonadales	Pseudomonadaceae	Pseudomonas	NA
ASV2289	12.955	2.34001	0.685114	3.4155	0.0006366	0.0240228	Bacteria	Actinobacteria	Actinobacteria	Propionibacteriales	Nocardioidaceae	Nocardioides	endophyticus
ASV14189	58.4455	4.99653	1.48426	3.36634	0.0007617	0.0243181	Bacteria	Proteobacteria	Gammaproteobacteria	Pseudomonadales	Pseudomonadaceae	Pseudomonas	NA
ASV27677	19.3015	-2.52041	0.743733	-3.38887	0.0007018	0.0243181	Bacteria	Proteobacteria	Alphaproteobacteria	Azospirillales	Azospirillaceae	Skermanella	NA
ASV37446	88.4282	1.98454	0.592896	3.3472	0.0008163	0.0243181	Bacteria	Bacteroidetes	Bacteroidia	Cytophagales	Hymenobacteraceae	Hymenobacter	NA
ASV37665	1054.11	2.41744	0.720238	3.35645	0.0007895	0.0243181	Bacteria	Bacteroidetes	Bacteroidia	Flavobacteriales	Weeksellaceae	Chryseobacterium	NA
ASV37361	14.0547	1.71862	0.522548	3.28893	0.0010057	0.0271058	Bacteria	Bacteroidetes	Bacteroidia	Cytophagales	Hymenobacteraceae	Hymenobacter	NA
ASV37391	16.7351	2.29827	0.698215	3.29164	0.0009961	0.0271058	Bacteria	Bacteroidetes	Bacteroidia	Cytophagales	Hymenobacteraceae	Hymenobacter	NA
ASV27613	14.9171	-3.51722	1.07495	-3.27199	0.0010679	0.0274748	Bacteria	Proteobacteria	Alphaproteobacteria	Azospirillales	Azospirillaceae	Skermanella	NA
ASV2791	4.65625	-2.82122	0.876524	-3.21864	0.001288	0.0316961	Bacteria	Actinobacteria	Actinobacteria	Micrococcales	Microbacteriaceae	Rathayibacter	tritici
ASV14050	30.9513	-2.13549	0.676285	-3.15767	0.0015903	0.0346683	Bacteria	Proteobacteria	Gammaproteobacteria	Enterobacteriales	Enterobacteriaceae	Arsenophonus	NA
ASV14057	94.0318	-2.19831	0.69248	-3.17455	0.0015007	0.0346683	Bacteria	Proteobacteria	Gammaproteobacteria	Enterobacteriales	Enterobacteriaceae	Arsenophonus	NA
ASV37341	10.2801	1.95928	0.620561	3.15727	0.0015925	0.0346683	Bacteria	Bacteroidetes	Bacteroidia	Cytophagales	Hymenobacteraceae	Hymenobacter	NA
ASV14051	23.4539	-2.2361	0.720343	-3.10422	0.0019078	0.038565	Bacteria	Proteobacteria	Gammaproteobacteria	Enterobacteriales	Enterobacteriaceae	Arsenophonus	NA
ASV37117	4.14021	3.56136	1.14668	3.10581	0.0018976	0.038565	Bacteria	Bacteroidetes	Bacteroidia	Cytophagales	Hymenobacteraceae	Hymenobacter	NA
ASV37342	5.54386	2.09291	0.68065	3.07487	0.002106	0.0411024	Bacteria	Bacteroidetes	Bacteroidia	Cytophagales	Hymenobacteraceae	Hymenobacter	NA
ASV27644	23.9706	-2.94776	0.965014	-3.05462	0.0022534	0.0425147	Bacteria	Proteobacteria	Alphaproteobacteria	Azospirillales	Azospirillaceae	Skermanella	NA
ASV957	8.81299	2.69864	0.890532	3.03037	0.0024426	0.043203	Bacteria	Actinobacteria	Actinobacteria	Micrococcales	Micrococcaceae	NA	NA
ASV42557	4.29028	-3.20135	1.05601	-3.03157	0.0024329	0.043203	Bacteria	Proteobacteria	Alphaproteobacteria	Rhizobiales	Beijerinckiaceae	Methylobacterium	NA
ASV37362	7.74685	2.16932	0.71947	3.01516	0.0025684	0.044052	Bacteria	Bacteroidetes	Bacteroidia	Cytophagales	Hymenobacteraceae	Hymenobacter	NA
ASV13047	7.86223	-2.91255	0.975177	-2.98668	0.0028202	0.0469482	Bacteria	Deinococcus-Thermus	Deinococci	Deinococcales	Deinococcaceae	Deinococcus	NA
